# Supplementary material
Source: PubMed Central journal article supplement (PMC7561279)
Supplement: NIHMS1541823-supplement-3.pdf [file NIHMS1541823-supplement-3.pdf]

## Supplementary Figure S3

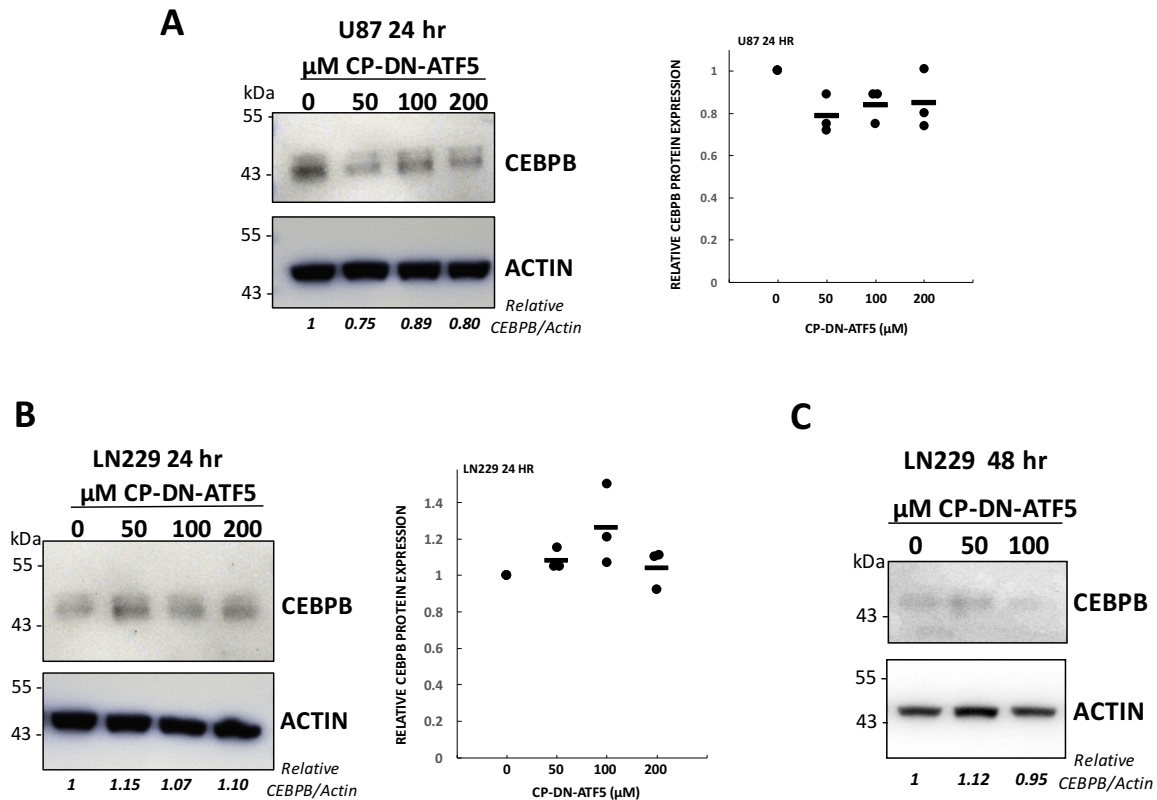

## Supplementary Figure S3

CP-DN-ATF5 has relatively little effect on expression of CEBPB in U87 and LN229 cells. **A**, CP-DN-ATF5 treatment for 24 hours has relatively little effect on CEBPB expression in U87 cells as determined by Western immunoblotting. Representative blot is shown on the left, quantitative data on the right. Data represent levels of CEBPB expression (normalized to ACTIN) relative to those in untreated controls as determined by Western immunoblotting in 3 independent experiments. **B**, CP-DN-ATF5 treatment for 24 hours has relatively little effect on CEBPB expression in LN229 cells as determined by Western immunoblotting. Representative blot is shown on the left, quantitative data on the right. Data represent levels of CEBPB expression relative to those in untreated controls as determined by Western immunoblotting in 3 independent experiments. **C**, CP-DN-ATF5 treatment for 48 hours has relatively little effect on CEBPB expression in LN229 cells as determined by Western immunoblotting.
