# Supplementary material
Source: PubMed Central journal article supplement (PMC7561279)
Supplement: NIHMS1541823-supplement-5.pdf [file NIHMS1541823-supplement-5.pdf]

## Supplementary Figure S5

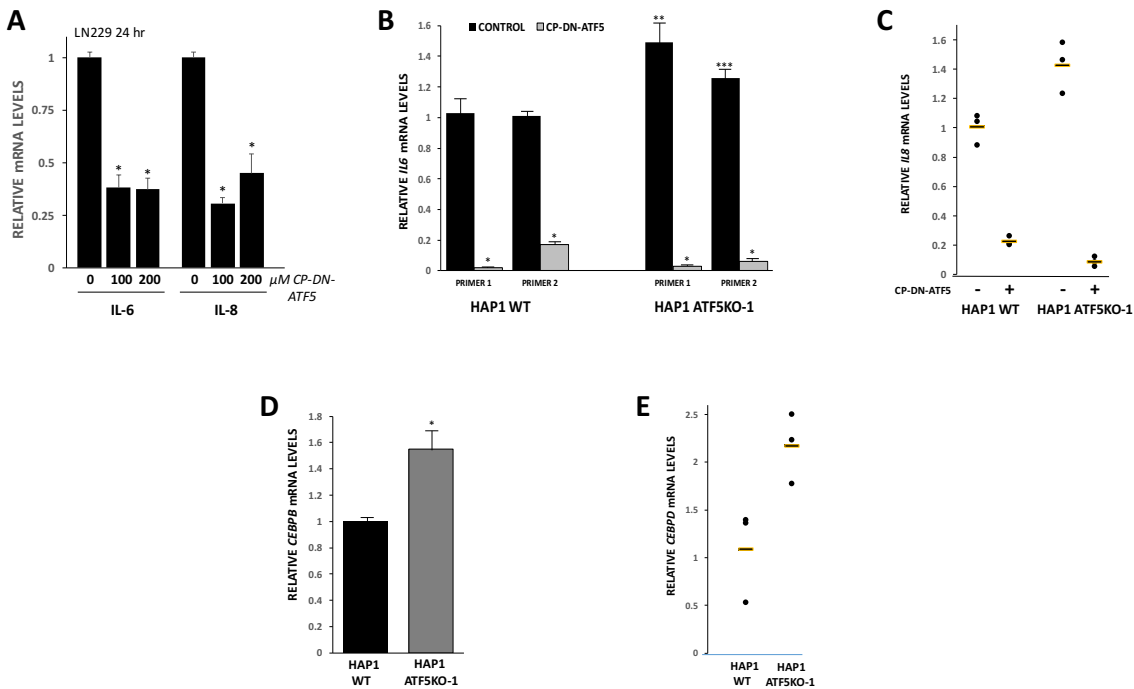

## Supplementary Figure S5

CP-DN-ATF5 reduces *IL6* and *IL8* expression in LN229, HAP1, and HAP1 ATF5KO-1 cells. **A**. CP-DN-ATF5 reduces the expression of *IL6* and *IL8* mRNA in LN229 cells. Replicate cultures were exposed to the indicated concentrations of CP-DN-ATF5 for 24 hours and then assessed for relative levels of *IL6* and *IL8* transcripts. Values represent means  $\pm$  SEM and were derived from 3 independent experiments carried out in triplicate.  $*P < 0.001$  compared with corresponding control. **B**. CP-DN-ATF5 reduces expression of *IL6* mRNA in HAP1 cells irrespective of the presence of ATF5 expression. Replicate cultures were exposed to 100  $\mu$ M CP-DN-ATF5 for 72 hours and then assessed for relative levels of *IL6* mRNA using two different primers. Values represent means  $\pm$  SEM and were derived from 2 independent experiments carried out in triplicate.  $*P < 0.0001$  compared with corresponding controls.  $**P = 0.025$  compared with WT control cells.  $***P = 0.0045$  compared with WT control cells. **C**. CP-DN-ATF5 reduces expression of *IL8* mRNA in HAP1 cells irrespective of the presence of ATF5 expression. Replicate cultures in one experiment were exposed to 100  $\mu$ M CP-DN-ATF5 for 72 hours and then assessed for relative levels of *IL8* mRNA. Bar indicates mean. **D**. Relative expression of *CEBPB* mRNA in WT and ATF5KO-1 HAP1 cells. Values represent means  $\pm$  SEM and were derived from 2 independent experiments carried out in triplicate.  $*P < 0.001$  compared with WT cells. **E**. Relative expression of

*CEBPD* mRNA in WT and ATF5KO-1 HAP1 cells. Values are for one experiment carried out with 3 cultures each. Bar indicates mean.
